# Supplementary material for: Echocardiography practice, training and accreditation in the intensive care: document for the World Interactive Network Focused on Critical Ultrasound (WINFOCUS)
Source: PubMed Central journal article supplement (PMC2586628; doi:10.1186/1476-7120-6-49), 2008-10-06
Supplement: 1476-7120-6-49-S1.pdf [file 1476-7120-6-49-S1.pdf]

**Table 2. Minimum dataset and additional data comprising the standard adult TTE study.** *The table summarizes the minimum and additional data comprising the standard adult TTE stud by view, modality, structure, measurements, and derived calculations. Additional data are annotated with [A]. Views and measurements not supported unanimously are given in italics.* CFM = color flow mapping; PW = pulsed wave Doppler; CW = continuous wave Doppler; LV = left ventricle; RV = right ventricle; LA = left atrium; RA = right atrium; Las = LA in systole; LVIDd/s left ventricular internal diameter in diastole and systole; LVSD/s left ventricular septal width in diastole and systole; LVPWd/s left ventricular posterior wall width in diastole and systole; MV = mitral valve; MR = mitral regurgitation; MS = mitral stenosis; LVOT = left ventricular outflow tract; AR = aortic regurgitation; AS = aortic stenosis; VSD = ventricular septal defect; IVC = inferior vena cava; SVC = superior vena cava; TV = tricuspid valve; TR = tricuspid regurgitation; Vmax, V mean = maximum and mean velocities; VTI = velocity-time integral; Pmax, P mean = maximum and mean pressure gradient; RVOT = right ventricular outflow tract; PV = pulmonary valve; PR = pulmonary regurgitation; PS = pulmonary stenosis; PA = pulmonary artery; PAPs,d = pulmonary artery pressure, systolic/diastolic; AV = aortic valve; RUPV = right upper pulmonary vein; PDA = pervium doctus arteriosum; PHT pressure half-time; DET deceleration time; IVRT = isovolumic relaxation time; RVd right ventricular cavity diameter in diastole; MVA = mitral valve area; IVS = inter-ventricular septum; SAX = short axis; Ch = chamber.

| <b>View</b>            | <b>Modality</b> | <b>Structures Assessed</b>                                                                                                        | <b>Measure</b>                                                                                             | <b>Calculate</b> |
|------------------------|-----------------|-----------------------------------------------------------------------------------------------------------------------------------|------------------------------------------------------------------------------------------------------------|------------------|
| <b>Parasternal LAX</b> | 2D              | LV cavity size, wall thickness, function<br>RV cavity size and function<br>LA size<br>Aortic root & valve – appearance & function | LVIDd/s, LVSD/s, LVPWd/s<br><br>LAs<br><br>annulus, root, sinuses, sino-tubular junction, ascending .aorta | FS               |
|                        | M mode          | LV cavity size, wall thickness                                                                                                    | LVIDd/s, LVSD/s, LVPWd/s                                                                                   | FS               |

|                                |     |                                                                                                                                             |                                                                  |                     |
|--------------------------------|-----|---------------------------------------------------------------------------------------------------------------------------------------------|------------------------------------------------------------------|---------------------|
|                                | CFM | RV cavity size<br>MV<br>AV/aortic root/LA size                                                                                              | RV(d)<br>± End Systolic separation<br>LAs, cusp separation, root | LA:Ao ratio [A]     |
|                                |     | MV inflow / MR<br>LVOT / AR<br>VSD                                                                                                          | AR width                                                         | AR:LVOT ratio [A]   |
| <b>RV inflow [A]</b>           | 2D  | RV cavity size and function<br>RA, IVC, SVC, ± coronary sinus<br>TV – appearance and function                                               |                                                                  |                     |
|                                | CFM | TV inflow, TR                                                                                                                               |                                                                  |                     |
|                                | CW  | TR                                                                                                                                          | Vmax                                                             | PA pressure         |
| <b>RV outflow</b>              | 2D  | RVOT, PV, main PA                                                                                                                           | PV annulus                                                       |                     |
|                                | CFM | RVOT, PS, PR, PA                                                                                                                            |                                                                  |                     |
|                                | PW  | RVOT                                                                                                                                        | Vmax, Vmean, VTI                                                 |                     |
|                                | CW  | PS<br>PR                                                                                                                                    | Vmax, Vmean<br>Vmax PRed                                         | Pmax, Pmean<br>PAPd |
| <b>Parasternal SAX (basal)</b> | 2D  | LA atrial septum<br>RA<br>TV – appearance and function<br>RV cavity size and function<br>PV, PA main, right<br>AV – appearance and function |                                                                  |                     |
|                                | CFM | SVC, RUPV, atrial septum [A]<br>TV inflow, TR [A]                                                                                           |                                                                  |                     |

|                                |     |                                                                                                                                                                                      |                                          |                                    |
|--------------------------------|-----|--------------------------------------------------------------------------------------------------------------------------------------------------------------------------------------|------------------------------------------|------------------------------------|
|                                |     | RVOT, PS, PR, PA (PDA) [A]                                                                                                                                                           | Vmax, Vmean, VTI                         |                                    |
|                                | PW  | RVOT [A]                                                                                                                                                                             | Vmax                                     | PAPs                               |
|                                | CW  | TR [A]<br>PS [A]<br>PR [A]                                                                                                                                                           | Vmax, Vmean<br>Vmax PRed                 | Pmean, Pmax<br>PAPd                |
| <b>Parasternal SAX (MV)</b>    | 2D  | LV size, wall thickness, function (basal segments)<br>RV cavity size and function<br>MV – appearance and function                                                                    | MVA planimetry [A]                       |                                    |
|                                | CFM | MV inflow, MR [A]<br>(VSD)                                                                                                                                                           |                                          |                                    |
| <b>Parasternal SAX (cords)</b> | 2D  | LV size, wall thickness, function (mid segments)                                                                                                                                     |                                          |                                    |
|                                | CFM | (VSD)                                                                                                                                                                                |                                          |                                    |
| <b>Parasternal SAX (apex)</b>  | 2D  | LV size, wall thickness, function (apical segment)                                                                                                                                   |                                          |                                    |
|                                | CFM | (VSD)                                                                                                                                                                                |                                          |                                    |
| <b>Apical 4Ch</b>              | 2D  | LV cavity size, wall thickness, function<br>(IVS, lateral wall)<br>RV cavity size and function<br>LA size<br>RA size<br>MV – appearance and function<br>TV – appearance and function | Area or volume [A]<br>Area or volume [A] | LA vol index[A]<br>RA vol index[A] |
|                                | CFM | MV inflow, MR<br>TV inflow, TR                                                                                                                                                       |                                          |                                    |
|                                | PW  | LV inflow (MV tips)                                                                                                                                                                  | E, E DET,A<br>IVRT [A]                   | E/A ratio                          |
|                                | CW  | MS                                                                                                                                                                                   | Vmax, Vmean [A]                          | Pmax, Pmean<br>PHT [A] MVA         |

|                      |           |                                                                                                                       |                               |                       |
|----------------------|-----------|-----------------------------------------------------------------------------------------------------------------------|-------------------------------|-----------------------|
|                      |           | MR<br>TS<br>TR                                                                                                        | Vmax, Vmean [A]<br>Vmax       | Pmax, Pmean<br>PAPs   |
| <b>Apical 5Ch</b>    | 2D        | LV cavity size, wall thickness, function [A]<br>LVOT, AV – appearance and function                                    |                               |                       |
|                      | CFM       | LVOT, AV                                                                                                              |                               |                       |
|                      | PW        | LVOT                                                                                                                  | VTI [A]<br>Vmax, Vmean [A]    | SV, CO<br>Pmax, Pmean |
|                      | CW        | AS<br>AR                                                                                                              | Vmax, Vmean [A]<br>AR DET [A] | Pmax, Pmean           |
| <b>Apical 2Ch</b>    | 2D        | LV cavity size, wall thickness, function (anterior, inferior wall) & appearance                                       |                               |                       |
| <b>Apical LAX</b>    | 2D        | LV cavity size, wall thickness, function (IVS, posterior wall) & appearance<br><br>LVOT, AV – appearance and function |                               |                       |
| <b>Subcostal 4Ch</b> | 2D<br>CFM | 4 chamber structures<br>Atrial septum<br>4 chamber structures                                                         |                               |                       |

|                      |        |                                                                                                           |                                    |                            |
|----------------------|--------|-----------------------------------------------------------------------------------------------------------|------------------------------------|----------------------------|
| <b>Subcostal SAX</b> | 2D     | SAX structures<br>Atrial septum<br>IVC, Hepatic Veins (modified view)<br>Descending Aorta (modified view) |                                    |                            |
|                      | M-mode | IVC                                                                                                       | Diameter, Respiratory variation    | IVC distens. index         |
|                      | CFM    | SAX structures<br>Atrial septum<br>IVC , Hepatic. Veins<br>Descending. Aorta                              |                                    |                            |
|                      | PW     | Hepatic Veins<br>Descending. Aorta                                                                        |                                    |                            |
| <b>Supra-sternal</b> | 2D     | Arch                                                                                                      |                                    |                            |
|                      | CFM    | Arch, coarctation, PDA                                                                                    |                                    |                            |
|                      | PW     | Descending. Aorta                                                                                         | Flow reversal                      |                            |
|                      | CW     | Ascending Aorta (AS)<br>Descending. Aorta (coarctation)                                                   | Vmax, Vmean [A]<br>Vmax, Vmean [A] | Pmax, Pmean<br>Pmax, Pmean |
