# Supplementary material for: Echocardiography practice, training and accreditation in the intensive care: document for the World Interactive Network Focused on Critical Ultrasound (WINFOCUS)
Source: PubMed Central journal article supplement (PMC2586628; doi:10.1186/1476-7120-6-49), 2008-10-06
Supplement: 1476-7120-6-49-S4.pdf [file 1476-7120-6-49-S4.pdf]

**Modular structure of the Echocardiography in ICU training programme.** The training programme comprises emergency-introductory, basic and intermediate stages, each one with its own modules. Theoretical and practical content of each module is delivered respectively through blended-learning and supervised practice.

| MODULE TYPE                                                 | MODULES                                                                                                                                                                                                                                                                                                                                                                                                                                                                                                                                                 |
|-------------------------------------------------------------|---------------------------------------------------------------------------------------------------------------------------------------------------------------------------------------------------------------------------------------------------------------------------------------------------------------------------------------------------------------------------------------------------------------------------------------------------------------------------------------------------------------------------------------------------------|
| Introductory & Emergency modules                            | <ul style="list-style-type: none"> <li>- Principles of US</li> <li>- Principles of Doppler</li> <li>- “Knobology”</li> <li>- Pitfalls and Artifacts in Echocardiography</li> <li>- Patient safety &amp; consent</li> <li>- Sonoanatomy of the Heart</li> <li>- ACLS Conformed Focused Echo (FEEL)</li> <li>- Screening Focused Echo (FATE)</li> </ul>                                                                                                                                                                                                   |
| Basic modules                                               | <ul style="list-style-type: none"> <li>- Qualitative evaluation of the Left ventricle (LV)</li> <li>- Qualitative evaluation of the Right ventricle (RV)</li> <li>- Measuring Inferior (IVC) &amp;/or Superior (SVC) Vena Cava diameter</li> <li>- Measurement of LV Outflow Tract (LVOT) peak velocity and VTI</li> <li>- Measurement of Cardiac Output (CO)</li> <li>- Estimation of peak Pulmonary Artery Pressure (PAPs)</li> </ul>                                                                                                                 |
| Intermediate modules:<br>Assessment of Ventricular function | <ul style="list-style-type: none"> <li>- Quantification of LV systolic function</li> <li>- Quantification of RV systolic function</li> <li>- LV diastolic function</li> <li>- RV diastolic function</li> <li>- Estimation of Left Atrial Pressure (LAP)</li> <li>- Detection of Myocardial ischemia</li> </ul>                                                                                                                                                                                                                                          |
| Intermediate modules:<br>Valvular Disease                   | <ul style="list-style-type: none"> <li>- Aortic Stenosis (AS)</li> <li>- Aortic Regurgitation (AR)</li> <li>- Mitral Regurgitation (MR)</li> <li>- Mitral Stenosis (MS)</li> <li>- Tricuspid valve (TV)</li> <li>- Pulmonary valve (PV)</li> </ul>                                                                                                                                                                                                                                                                                                      |
| Intermediate modules:<br>Clinical scenarios                 | <ul style="list-style-type: none"> <li>- General Approach to the Shocked patient</li> <li>- Hypovolaemia, Volume Responsiveness &amp; Filling Status</li> <li>- Tamponade</li> <li>- The Sepsis Syndromes</li> <li>- Effects of Preload and Afterload</li> <li>- Hypoxaemia</li> <li>- Anatomical shunt</li> <li>- Acute Cor Pulmonale (Pulmonary Embolism, ARDS)</li> <li>- Complications of Acute Myocardial Infarction</li> <li>- Chest trauma</li> <li>- Failure to wean from Mechanical Ventilation</li> <li>- Hemodynamic Measurements</li> </ul> |
